# Supplementary material for: Carbon-ensemble-manipulated ZnS heterostructures for enhanced photocatalytic H2evolution
Source: Royal Society of Chemistry journal article supplement (doi:10.1039/c4nr02368d), 2014-06-06
Supplement: c4nr02368d1.pdf [file c4nr02368d1.pdf]

## Electronic Supplementary Information for Carbon-ensemble-manipulated ZnS heterostructures for enhanced photocatalytic H<sub>2</sub> evolution

Jing Wang<sup>a</sup>, Yee-Fun Lim<sup>b</sup>, Ghim Wei Ho<sup>a,b\*</sup>

<sup>a</sup> Department of Electrical and Computer Engineering, National University of Singapore, 4 Engineering Drive 3, 117576, Singapore. E-mail: elehgw@nus.edu.sg

<sup>b</sup> Institute of Materials Research and Engineering, A\*STAR (Agency for Science, Technology and Research), 3 Research Link, 117602, Singapore

\*To whom correspondence should be addressed. E-mail: elehgw@nus.edu.sg

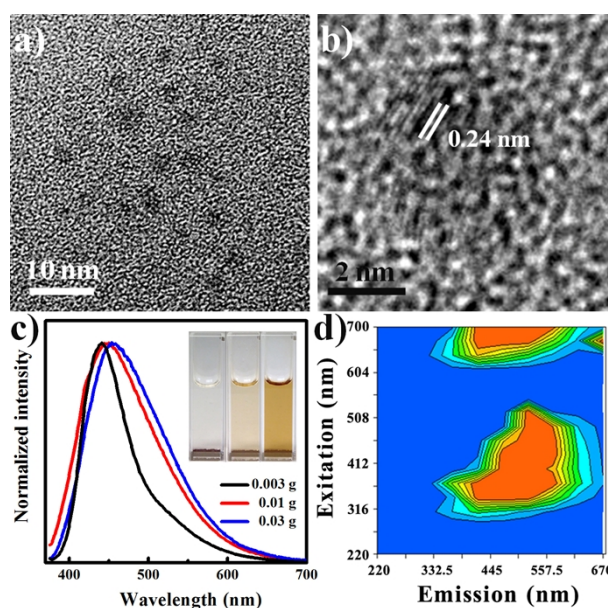

**Fig. S1** TEM images of typical glucose-derived CDs (glucose amount: 0.01 g) at (a) low and (b) high magnifications. (c) PL spectra of glucose-derived CDs obtained at different glucose amounts of 0.003, 0.01 and 0.03 g. (d) Typical PL distribution map of the CDs.

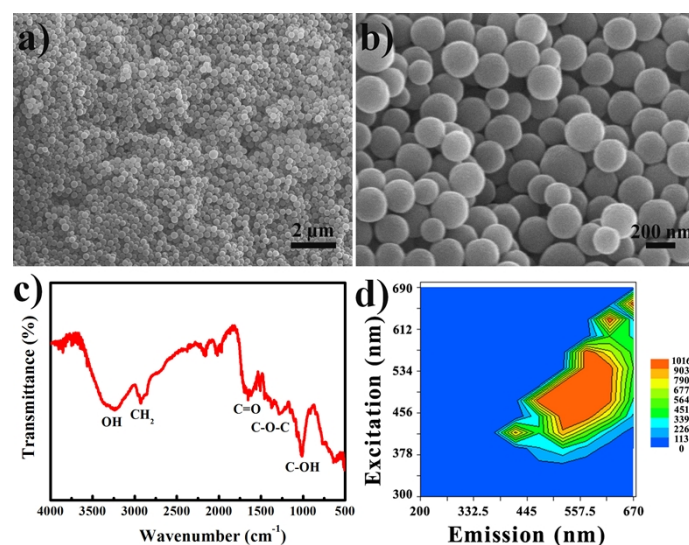

**Fig. S2** SEM images of the glucose-derived carbon nanospheres (glucose amount: 2 g) at (a) low and (b) high magnification. (c) FT-IR spectrum of the carbon nanospheres. (d) PL

distribution map of the carbon nanospheres.

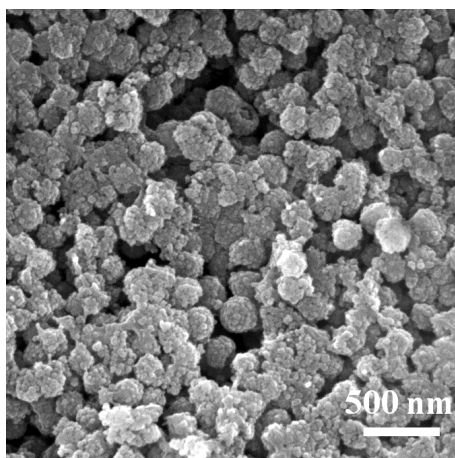

**Fig. S3** SEM image of the ZnS/carbon core-shell structure.

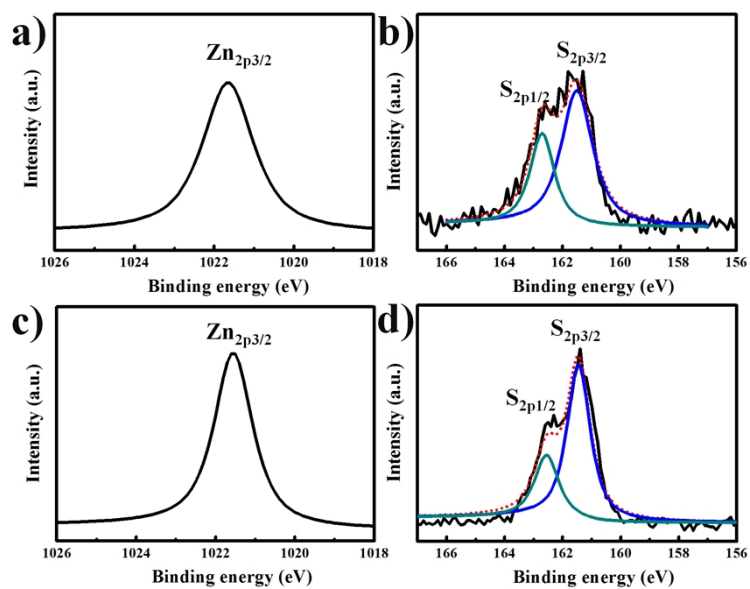

**Fig. S4** Zn 2p and S 2p XPS spectra of (a,b) ZnS/CDs nanocomposites and (c,d) the ZnS/carbon core-shell nanostructure.
